# Supplementary material for: Immunoinformatics-Aided Design of a Peptide Based Multiepitope Vaccine Targeting Glycoproteins and Membrane Proteins against Monkeypox Virus
Source: MDPI journal article supplement (doi:10.3390/v14112374), 2022-10-27
Supplement: s1 [file s1]

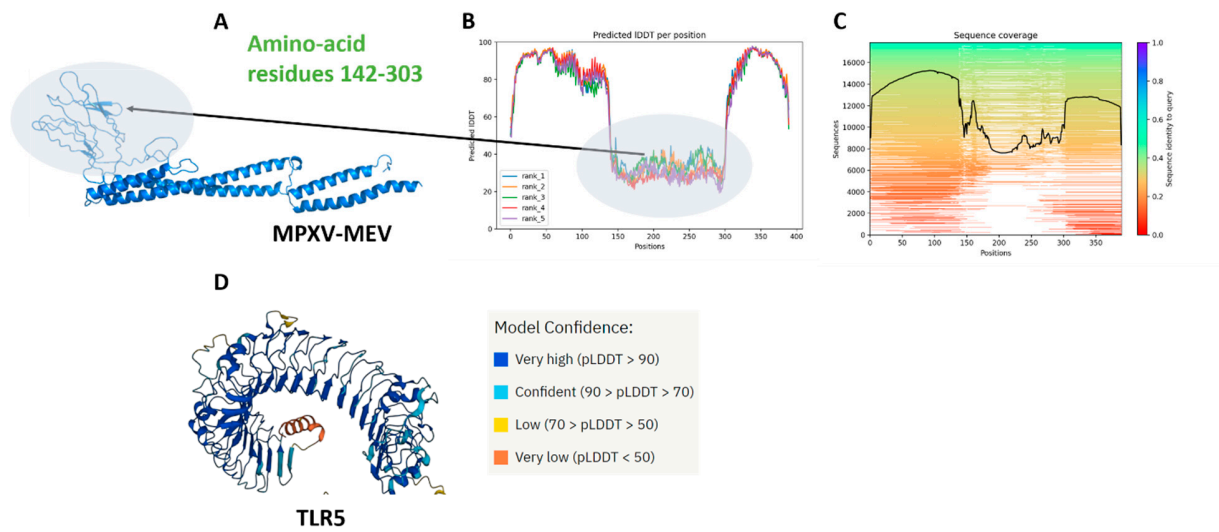

**Figure S1:** Modeling of MPXV-MEV construct and TLR5 receptor using AlphaFold. A) Modeled structure of MPXV-MEV with residues 142-303 (where adjuvants, epitopes and linkers are inserted) in grey highlighted area; B) Predicted LDDT values for positions in MPXV-MEV construct for different models obtained from AlphaFold prediction; C) Sequence coverage map of MPXV-MEV vaccine construct; D) Modeled structure of TLR5 receptor with the predicted LDDT values.

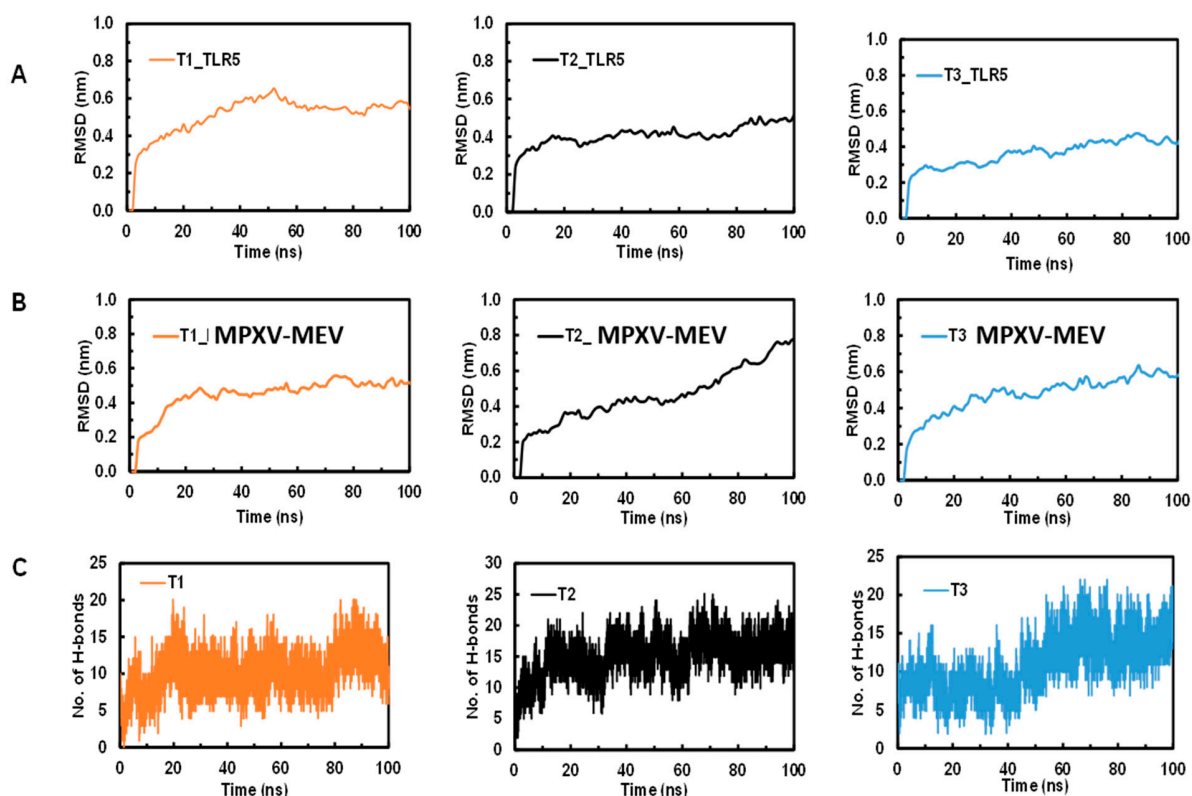

**Figure S2:** Molecular dynamics simulations results obtained from three independent simulations for Root Mean Square Deviation (RMSD) for A) TLR5 and B) MAXV-MEV. C) Total number of hydrogen bonds between TLR5 and MPXV-MEV.

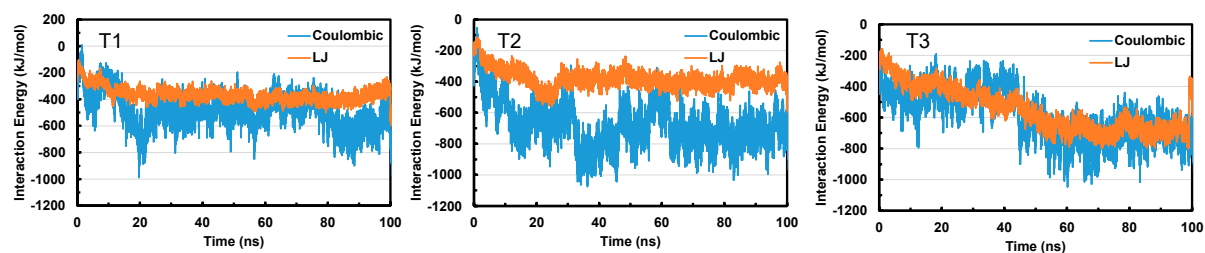

**Figure S3:** Interaction energy between TLR5 and MAXV-MEV obtained from three independent simulations. Lennard Jones (LJ) and Coulombic interaction energy is shown with orange and blue lines, respectively.

Method for calculating the population coverage:

Default values of the “number of epitopes” and “query by” box were chosen. “World” was chosen for “select area(s) and/or population(s)”. For epitopes RIYFVSLSL and FSIGGVIHL “class II separate” option and for epitopes IYFVSLSLL, LKHKGCSL, AYTSISVVF and RYPIIDIKW “class I separate” option in “select calculation options” were used. Then the epitopes were pasted in the “epitope box”. For MHCII epitopes DRB1\_0101, DRB1\_0301, DRB1\_0401, DRB1\_0701, DRB1\_0801, DRB1\_0901, DRB1\_1001, DRB1\_1101, DRB1\_1201, DRB1\_1301, DRB1\_1501, and DRB1\_1602 alleles were selected and for MHC-I epitopes HLA-A0101, HLA A0201, HLA-A0301, HLA-A2402, HLA-A260, HLA-B0702, HLA-B0801, HLA-B2705, HLA-B3901, HLA-B4001, and HLA-B5801 alleles were chosen.

**Table S1:** Prediction of helper T cell epitopes and their antigenicity, allergenicity, toxicity and interferon- $\gamma$  inducing ability

| Protein ID | Allele    | Peptide    | Binding Affinity (nM) | Vaxijen score | Antigen/Non-antigen | Allergenicity | Toxicity  | Interferon- $\gamma$ inducing ability |
|------------|-----------|------------|-----------------------|---------------|---------------------|---------------|-----------|---------------------------------------|
| AIE40786.1 | DRB1_0101 | FKLILDPKI  | 50.5                  | 0.5910        | Antigen             | Allergen      | Non-toxin | No                                    |
|            |           | YFVSLSLLL  | 1064.0                | 0.9237        | Antigen             | Allergen      | Non-toxin | Yes                                   |
|            |           | YSILTSRGG  | 1346.5                | 0.8118        | Antigen             | Allergen      | Non-toxin | No                                    |
|            | DRB1_0301 | LFVDDVLIE  | 1385.5                | -0.2442       | Non-antigen         | Allergen      | Non-toxin | No                                    |
|            |           | VHYDDVRIK  | 1397.9                | 1.3493        | Antigen             | Non-allergen  | Non-toxin | No                                    |
|            |           | IKNDIVVSR  | 1468.3                | 0.2927        | Non-antigen         | Non-allergen  | Non-toxin | No                                    |
|            |           | LILDPKINV  | 2341.9                | 0.7445        | Antigen             | Allergen      | Non-toxin | No                                    |
|            |           | INIDDFKYS  | 3227.5                | 0.8011        | Antigen             | Non-allergen  | Non-toxin | No                                    |
|            |           | RIKNDIVVS  | 5468.8                | 0.4547        | Antigen             | Non-allergen  | Non-toxin | No                                    |
|            |           | LIIHNP ELE | 7117.3                | 0.1541        | Non-antigen         | Allergen      | Non-toxin | Yes                                   |
|            |           | IGLDFGVYS  | 8877.2                | 1.2209        | Antigen             | Allergen      | Non-toxin | No                                    |
|            |           | KLILDPKIN  | 9353.2                | 0.6287        | Antigen             | Allergen      | Non-toxin | No                                    |
|            | DRB1_0401 | YFVSLSLLL  | 2452.3                | 0.9237        | Antigen             | Allergen      | Non-toxin | Yes                                   |
|            |           | YYFDKTLTT  | 2987.7                | 0.2380        | Non-antigen         | Non-allergen  | Non-toxin | No                                    |
|            |           | YLCTVTTKN  | 3891.7                | 1.6441        | Antigen             | Allergen      | Non-toxin | No                                    |
|            |           | YAKHYNNIT  | 4585.9                | 0.6238        | Antigen             | Non-allergen  | Non-toxin | No                                    |
|            |           | VYSILTSRG  | 6768.0                | 0.6613        | Antigen             | Non-allergen  | Non-toxin | No                                    |
|            | DRB1_0701 | FKLILDPKI  | 94.9                  | 0.5910        | Antigen             | Allergen      | Non-toxin | No                                    |
|            |           | LFHSYAIDI  | 108.8                 | 0.4868        | Antigen             | Allergen      | Non-toxin | No                                    |
|            |           | YFVSLSLLL  | 121.3                 | 0.9237        | Antigen             | Allergen      | Non-toxin | Yes                                   |
|            |           | LLLFHSYAI  | 131.4                 | 0.2825        | Non-antigen         | Allergen      | Non-toxin | Yes                                   |
|            |           | FDKTLTTTV  | 193.5                 | 0.1539        | Non-antigen         | Non-allergen  | Non-toxin | No                                    |
|            |           | KTLTTTVVL  | 261.3                 | 0.1327        | Non-antigen         | Allergen      | Non-toxin | No                                    |
|            |           | SAVSTSLFV  | 287.2                 | 0.0182        | Non-antigen         | Non-allergen  | Non-toxin | No                                    |

|  |           |           |        |         |             |              |           |     |
|--|-----------|-----------|--------|---------|-------------|--------------|-----------|-----|
|  |           | IVVSRCKIL | 319.5  | 0.1110  | Non-antigen | Allergen     | Non-toxin | No  |
|  | DRB1_0801 | MKMKMMVRI | 333.6  | 0.8614  | Antigen     | Allergen     | Non-toxin | Yes |
|  |           | MKMMVRIYF | 445.0  | 0.3443  | Non-antigen | Allergen     | Non-toxin | No  |
|  |           | LLFHSYAID | 630.9  | 0.3597  | Non-antigen | Non-allergen | Non-toxin | No  |
|  |           | FKYSQAGKE | 730.4  | 0.9583  | Antigen     | Allergen     | Non-toxin | No  |
|  |           | GILYAKHYN | 805.1  | 1.2526  | Antigen     | Allergen     | Non-toxin | No  |
|  |           | YSILTSRGG | 826.1  | 0.8118  | Antigen     | Allergen     | Non-toxin | No  |
|  |           | LWIANYTSK | 834.2  | 0.3380  | Non-antigen | Allergen     | Non-toxin | No  |
|  | DRB1_0901 | FKYSQAGKE | 335.8  | 0.9583  | Antigen     | Allergen     | Non-toxin | No  |
|  |           | LFHSYAIDI | 480.9  | 0.4868  | Antigen     | Allergen     | Non-toxin | No  |
|  |           | YFVSLSLLL | 877.1  | 0.9237  | Antigen     | Allergen     | Non-toxin | Yes |
|  |           | FKLILDPKI | 976.4  | 0.5910  | Antigen     | Allergen     | Non-toxin | No  |
|  |           | VIPSQDHRF | 1294.5 | 1.0217  | Antigen     | Allergen     | Non-toxin | Yes |
|  | DRB1_1001 | YFVSLSLLL | 342.4  | 0.9237  | Antigen     | Allergen     | Non-toxin | Yes |
|  |           | YLCTVTTKN | 835.4  | 1.6441  | Antigen     | Allergen     | Non-toxin | No  |
|  |           | FKLILDPKI | 976.6  | 0.5910  | Antigen     | Allergen     | Non-toxin | No  |
|  | DRB1_1101 | WERLEKNRR | 805.0  | -0.3554 | Non-antigen | Non-allergen | Non-toxin | Yes |
|  |           | YSILTSRGG | 1834.1 | 0.8118  | Antigen     | Allergen     | Non-toxin | No  |
|  |           | KMKMMVRIY | 2424.7 | 0.2450  | Non-antigen | Allergen     | Non-toxin | Yes |
|  |           | MKMKMMVRI | 3912.1 | 0.8614  | Antigen     | Allergen     | Non-toxin | Yes |
|  | DRB1_1201 | KMKMMVRIY | 544.6  | 0.2450  | Non-antigen | Allergen     | Non-toxin | Yes |
|  |           | CGILYAKHY | 666.9  | 0.6483  | Antigen     | Allergen     | Non-toxin | No  |
|  |           | IIGLDFGVY | 820.9  | 0.9216  | Antigen     | Allergen     | Non-toxin | No  |

|  |           |            |        |         |             |              |           |     |
|--|-----------|------------|--------|---------|-------------|--------------|-----------|-----|
|  |           | LSLLLLFHSY | 937.7  | 0.4192  | Antigen     | Non-allergen | Non-toxin | No  |
|  | DRB1_1301 | MMKMKMMVR  | 5.4    | 0.6078  | Antigen     | Allergen     | Non-toxin | No  |
|  |           | RRRQVSNKR  | 9.7    | 0.3556  | Non-antigen | Non-allergen | Non-toxin | No  |
|  |           | MKMMVRIYF  | 15.1   | 0.3443  | Non-antigen | Allergen     | Non-toxin | Yes |
|  |           | MKMKMMVRI  | 16.9   | 0.8614  | Antigen     | Allergen     | Non-toxin | Yes |
|  |           | ERLEKNRRR  | 35.1   | -0.5015 | Non-antigen | Non-allergen | Non-toxin | Yes |
|  |           | WERLEKNRR  | 42.3   | -0.3554 | Non-antigen | Non-allergen | Non-toxin | Yes |
|  |           | LEKNRRRQV  | 46.3   | 0.4224  | Antigen     | Non-allergen | Non-toxin | Yes |
|  |           | RLEKNRRRQ  | 54.5   | -0.4682 | Non-antigen | Allergen     | Non-toxin | Yes |
|  |           | KMKMMVRIY  | 57.9   | 0.2450  | Non-antigen | Allergen     | Non-toxin | Yes |
|  |           | TSKFSNRRY  | 58.3   | 0.4125  | Antigen     | Allergen     | Non-toxin | No  |
|  |           | YTSKFSNRR  | 59.5   | 0.4382  | Antigen     | Non-allergen | Non-toxin | No  |
|  |           | VQGVVRSHV  | 65.6   | -0.0028 | Non-antigen | Allergen     | Non-toxin | No  |
|  |           | SKFSNRRYL  | 67.0   | 0.1667  | Non-antigen | Allergen     | Non-toxin | Np  |
|  | DRB1_1501 | LLLFHSYAI  | 224.0  | 0.2825  | Non-antigen | Allergen     | Non-toxin | Yes |
|  |           | RIYFVSLSL  | 342.0  | 1.6615  | Antigen     | Non-allergen | Non-toxin | Yes |
|  |           | FKLILDPKI  | 1876.8 | 0.5910  | Antigen     | Allergen     | Non-toxin | No  |
|  |           | VRIYFVSLS  | 3942.9 | 1.4782  | Antigen     | Allergen     | Non-toxin | No  |
|  | DRB1_1602 | YFVLSLLL   | 1861.3 | 0.9237  | Antigen     | Allergen     | Non-toxin | Yes |
|  |           | FKLILDPKI  | 3178.2 | 0.5910  | Antigen     | Allergen     | Non-toxin | No  |
|  |           | LLLFHSYAI  | 3736.8 | 0.2825  | Non-antigen | Allergen     | Non-toxin | Yes |
|  |           | RIYFVSLSL  | 3935.6 | 1.6615  | Antigen     | Non-allergen | Non-toxin | Yes |
|  |           | ELI IHNPEL | 5084.0 | -0.1336 | Non-antigen | Non-allergen | Non-toxin | No  |

|            |           |           |        |         |             |              |           |     |
|------------|-----------|-----------|--------|---------|-------------|--------------|-----------|-----|
| AIE40778.1 | DRB1_0101 | WNPILPTCV | 458.9  | 0.1552  | Non-antigen | Allergen     | Non-toxin | No  |
|            |           | YHIIIMALT | 548.5  | 0.7969  | Antigen     | Non-allergen | Non-toxin | No  |
|            |           | YHSLDPNAV | 1380.2 | 1.0653  | Antigen     | Allergen     | Non-toxin | Yes |
|            | DRB1_0301 | VCETDKWKY | 8635.7 | -0.4923 | Non-antigen | Non-allergen |           |     |
|            | DRB1_0401 | FTLTGSPSS | 5003.0 | 0.8750  | Antigen     | Non-allergen | Non-toxin | No  |
|            |           | VYSTCTVPT | 6000.5 | 0.1518  | Non-antigen | Allergen     |           |     |
|            |           | YISCTANSW | 6756.7 | 0.7152  | Antigen     | Allergen     | Non-toxin | Yes |
|            |           | LYEVNSTMT | 7614.2 | 0.8315  | Antigen     | Non-allergen | Non-toxin | Yes |
|            | DRB1_0701 | YEVIGVSYI | 196.4  | 1.1025  | Antigen     | Allergen     | Non-toxin | No  |
|            | DRB1_0801 | IMALTIMGV | 585.9  | 0.8565  | Antigen     | Allergen     | Non-toxin | Yes |
|            | DRB1_0901 | FSIGGVIHL | 206.0  | 1.2283  | Antigen     | Non-allergen | Non-toxin | Yes |
|            |           | IMALTIMGV | 885.6  | 0.8565  | Antigen     | Allergen     | Non-toxin | Yes |
|            | DRB1_1001 | YISCTANSW | 1276.8 | 0.7152  | Antigen     | Allergen     | Non-toxin | Yes |
|            |           | YEVIGVSYI | 1662.4 | 1.1025  | Antigen     | Allergen     | Non-toxin | No  |
|            | DRB1_1201 | LCVLPVVY  | 1075.9 | 0.6499  | Antigen     | Non-allergen | Non-toxin | Yes |
|            | DRB1_1301 | IMALTIMGV | 30.5   | 0.8565  | Antigen     | Allergen     | Non-toxin | Yes |
|            |           | IIIMALTIM | 44.1   | 0.6886  | Antigen     | Allergen     | Non-toxin | No  |
|            |           | LTIMGVIFL | 55.2   | 0.5872  | Antigen     | Allergen     | Non-toxin | No  |
|            |           | MKTISVVTL | 67.4   | 0.8900  | Antigen     | Allergen     | Non-toxin | No  |
|            | DRB1_1501 | HIIIMALTI | 2286.9 | 0.7663  | Antigen     | Non-allergen | Non-toxin | No  |
|            | DRB1_1602 | FTLTGSPSS | 4581.0 | 0.8750  | Antigen     | Non-allergen | Non-toxin | No  |
| AIE40766.1 | DRB1_0101 | ICMLIASTL | 481.7  | 0.7125  | Antigen     | Allergen     | Non-toxin | No  |
|            |           | IVSLSGNLK | 560.9  | 0.6211  | Antigen     | Non-allergen | Non-toxin | No  |
|            |           | FDRIYNNVV | 1045.6 | -0.6790 | Non-antigen |              |           |     |

|  |           |           |        |         |             |              |           |     |
|--|-----------|-----------|--------|---------|-------------|--------------|-----------|-----|
|  |           | CIAIIGYDS | 1570.7 | 0.6721  | Antigen     | Allergen     | Non-toxin | No  |
|  | DRB1_0301 | ILTSKHKTY | 6165.6 | 1.1168  | Antigen     | Allergen     | Non-toxin | No  |
|  |           | LYSSSIFR  | 8900.1 | -0.1911 | Non-antigen |              |           |     |
|  |           | DELDDNVFF | 8991.8 | -0.0805 | Non-antigen |              |           |     |
|  |           | IIYVFKKIK | 9835.0 | 0.5630  | Antigen     | Allergen     | Non-toxin | Yes |
|  |           | IYVFKKIKM | 1025.7 | 0.3446  | Non-antigen |              |           |     |
|  | DRB1_0401 | WYKYINDRY | 4846.6 | -0.5812 | Non-antigen |              |           |     |
|  |           | FDRIYNNVV | 5448.2 | -0.6790 | Non-antigen |              |           |     |
|  |           | IYNNVNIK  | 6360.4 | 0.4886  | Antigen     | Allergen     | Non-toxin | Yes |
|  |           | IISILTMSI | 6494.5 | 0.5157  | Antigen     | Non-allergen | Non-toxin | Yes |
|  |           | IMPVLTYS  | 6778.5 | 0.4387  | Antigen     | Allergen     | Non-toxin | No  |
|  |           | YRSTCIAII | 7432.5 | 1.6925  | Antigen     | Non-allergen | Non-toxin | No  |
|  |           | IVSLSGNLK | 7482.6 | 0.6211  | Antigen     | Non-allergen | Non-toxin | No  |
|  | DRB1_0701 | YSLYRSTCI | 22.6   | 0.5128  | Antigen     | Allergen     | Non-toxin | No  |
|  |           | CMLIASTLI | 25.9   | 0.5512  | Antigen     | Allergen     | Non-toxin | No  |
|  |           | YRSTCIAII | 56.0   | 1.6925  | Antigen     | Non-allergen | Non-toxin | No  |
|  |           | IFRFHSEDI | 57.7   | 0.2452  | Non-antigen |              |           |     |
|  |           | LIVSLSGNL | 67.2   | 0.0008  | Non-antigen |              |           |     |
|  |           | CSLNPSLIV | 100.3  | 0.7126  | Antigen     | Allergen     | Non-toxin | No  |
|  |           | LATSTSTIL | 161.9  | 0.0871  | Non-antigen |              |           |     |
|  |           | CSVNVSLI  | 205.9  | 0.8331  | Antigen     | Allergen     | Non-toxin | No  |
|  |           | FDRIYNNVV | 236.9  | -0.6790 | Non-antigen |              |           |     |
|  | DRB1_0801 | YFLKHKYGC | 190.0  | 0.9444  | Antigen     | Allergen     | Non-toxin | Yes |
|  |           | IYVFKKIKM | 235.0  | 0.3446  | Non-antigen |              |           |     |
|  |           | IIYVFKKIK | 291.2  | 0.5630  | Antigen     | Allergen     | Non-toxin | Yes |
|  |           | YVFKKIKMN | 359.4  | 0.2841  | Non-antigen |              |           |     |
|  |           | ILTMSIMPV | 389.8  | 0.9840  | Antigen     | Non-allergen | Non-toxin | Yes |
|  |           | TILTSKHKT | 576.0  | 0.9669  | Antigen     | Allergen     | Non-toxin | No  |



|  |           |           |        |         |             |              |           |     |
|--|-----------|-----------|--------|---------|-------------|--------------|-----------|-----|
|  | DRB1_0901 | YRSTCIAII | 115.1  | 1.6925  | Antigen     | Non-allergen | Non-toxin | No  |
|  |           | LIVSLSGNL | 174.4  | 0.0008  | Non-antigen |              |           |     |
|  |           | ICMLIASTL | 290.3  | 0.7125  | Antigen     | Allergen     | Non-toxin | No  |
|  |           | LTMSIMPVL | 299.6  | 1.1100  | Antigen     | Non-allergen | Non-toxin | No  |
|  |           | ILTMSIMPV | 488.9  | 0.9840  | Antigen     | Non-allergen | Non-toxin | Yes |
|  |           | LYRSTCIAI | 566.4  | 1.1388  | Antigen     | Allergen     | Non-toxin | No  |
|  |           | IFRFHSEDI | 593.1  | 0.2452  | Non-antigen |              |           |     |
|  |           | WYKYINDRY | 1091.7 | -0.5812 | Non-antigen |              |           |     |
|  | DRB1_1001 | YRSTCIAII | 1439.2 | 1.6925  | Antigen     | Non-allergen | Non-toxin | No  |
|  |           | YKYINDRYN | 1486.8 | 0.0098  | Non-antigen |              |           |     |
|  | DRB1_1101 | VFKKIKMNS | 1070.1 | 0.1505  | Non-antigen |              |           |     |
|  |           | IIVVFKKIK | 1392.5 | 0.5630  | Antigen     | Allergen     | Non-toxin | Yes |
|  |           | YFLKHKYGC | 1962.6 | 0.9444  | Antigen     | Allergen     | Non-toxin | Yes |
|  |           | YRYNFINRT | 2001.1 | 0.0471  | Non-antigen |              |           |     |
|  |           | TILTSKHKT | 2164.8 | 0.9669  | Antigen     | Allergen     | Non-toxin | No  |
|  |           | YVFKKIKMN | 2387.1 | 0.2841  | Non-antigen |              |           |     |
|  |           | IYVFKKIKM | 2667.7 | 0.3446  | Non-antigen |              |           |     |
|  |           | GYFLKHKYG | 3265.8 | 0.3599  | Non-antigen |              |           |     |
|  |           | YNFINRTFS | 4297.5 | 0.5352  | Antigen     | Non-allergen | Non-toxin | No  |
|  | DRB1_1201 | IYVFKKIKM | 787.0  | 0.3446  | Non-antigen |              |           |     |
|  |           | VSLSGNLKY | 1509.0 | 1.0750  | Antigen     | Non-allergen | Non-toxin | No  |
|  |           | ILTSKHKTY | 1515.3 | 1.1168  | Antigen     | Allergen     | Non-toxin | No  |
|  |           | MSIMPVLTY | 1521.8 | 0.8206  | Antigen     | Allergen     | Non-toxin | No  |
|  |           | IELCYGNLY | 1786.8 | 0.4470  | Antigen     | Non-allergen | Non-toxin | Yes |
|  | DRB1_1301 | IYVFKKIKM | 25.9   | 0.3446  | Non-antigen |              |           |     |
|  |           | TILTSKHKT | 29.8   | 0.9669  | Antigen     | Allergen     | Non-toxin | No  |
|  |           | MMKWIISIL | 31.4   | -0.3719 | Non-antigen |              |           |     |
|  |           | ILTMSIMPV | 33.0   | 0.9840  | Antigen     | Non-allergen | Non-toxin | Yes |
|  |           | MLIASTLIV | 35.3   | 0.2693  | Non-antigen |              |           |     |

|            |           |           |        |         |             |              |           |     |
|------------|-----------|-----------|--------|---------|-------------|--------------|-----------|-----|
|            |           | ILTSKHKTY | 44.0   | 1.1168  | Antigen     | Allergen     | Non-toxin | No  |
|            |           | VIIYVFKKI | 58.8   | -0.0063 | Non-antigen |              |           |     |
|            |           | VSLSGNLKY | 62.2   | 1.0750  | Antigen     | Non-allergen | Non-toxin | No  |
|            | DRB1_1501 | IYVFKKIKM | 476.4  | 0.3446  | Non-antigen |              |           |     |
|            |           | YSLYRSTCI | 572.1  | 0.5128  | Antigen     | Allergen     | Non-toxin | No  |
|            |           | IISILTMSI | 1337.2 | 0.5157  | Antigen     | Non-allergen | Non-toxin | Yes |
|            |           | IIGYDSIIW | 1796.2 | -0.0988 | Non-antigen |              |           |     |
|            |           | VLTYSSSIF | 2726.1 | -0.2037 | Non-antigen |              |           |     |
|            |           | LIVSLSGNL | 2833.6 | 0.0008  | Non-antigen |              |           |     |
|            |           | IIYVFKKIK | 2951.5 | 0.5630  | Antigen     | Allergen     | Non-toxin | Yes |
|            |           | ICMLIASTL | 3094.5 | 0.7125  | Antigen     | Allergen     | Non-toxin | No  |
|            | DRB1_1602 | WYKYINDRY | 1632.7 | -0.5812 | Non-antigen |              |           |     |
|            |           | IYVFKKIKM | 2196.9 | 0.3446  | Non-antigen |              |           |     |
|            |           | IFRFHSEDI | 2976.5 | 0.2452  | Non-antigen |              |           |     |
|            |           | YSLYRSTCI | 4022.2 | 0.5128  | Antigen     | Allergen     | Non-toxin | No  |
|            |           | FDRIYNNVV | 4943.8 | -0.6790 | Non-antigen |              |           |     |
|            |           | NFINRTFSV | 5257.2 | 0.7245  | Antigen     | Non-allergen | Non-toxin | No  |
| AIE40738.1 | DRB1_0701 | IIITVGMLI | 90.3   | 0.8226  | Antigen     | Allergen     | Non-toxin | No  |
|            |           | VIHTNHSDI | 148.8  | 0.8736  | Antigen     | Non-allergen | Non-toxin | Yes |
|            | DRB1_0801 | WKVLSIMAF | 269.7  | 0.9293  | Antigen     | Allergen     | Non-toxin | No  |
|            |           | MLIYSMWGK | 765.4  | 0.1378  | Non-antigen |              |           |     |
|            | DRB1_0901 | WKVLSIMAF | 536.1  | 0.9293  | Antigen     | Allergen     | Non-toxin | No  |
|            |           | FSGVLIAGI | 784.6  | 0.1127  | Non-antigen |              |           |     |
|            | DRB1_1001 | YFSGVLIAG | 868.0  | -0.0009 | Non-antigen |              |           |     |
|            |           | WKVLSIMAF | 1617.2 | 0.9293  | Antigen     | Allergen     | Non-toxin | No  |
|            | DRB1_1201 | DMMLMIGNY | 2034.4 | 0.7031  | Antigen     | Non-allergen | Non-toxin | No  |
|            |           | WKVLSIMAF | 2203.7 | 0.9293  | Antigen     | Allergen     | Non-toxin | No  |
|            | DRB1_1301 | MMLMIGNYF | 20.2   | 0.2284  | Non-antigen |              |           |     |
|            |           | WKVLSIMAF | 58.1   | 0.9293  | Antigen     | Allergen     | Non-toxin | No  |

|            |           |           |        |         |             |              |           |     |
|------------|-----------|-----------|--------|---------|-------------|--------------|-----------|-----|
|            | DRB1_1501 | MLLMIGNYF | 1643.0 | 0.2284  | Non-antigen |              |           |     |
|            |           | MLMIGNYFS | 2682.0 | 0.2211  | Non-antigen |              |           |     |
|            |           | IFAFIDFSK | 3037.9 | 0.8822  | Antigen     | Allergen     | Non-toxin | Yes |
|            |           | VLSIMAFIL | 4985.4 | 0.1959  | Non-antigen |              |           |     |
|            | DRB1_1602 | FIDFSKSTS | 4193.5 | 0.9517  | Antigen     | Non-allergen | Non-toxin | No  |
| AIE40737.1 | DRB1_0701 | ILYTLYNKI | 13.0   | 0.1086  | Non-antigen |              |           |     |
|            | DRB1_0801 | YTLYNKIKN | 426.0  | 0.2588  | Non-antigen |              |           |     |
|            | DRB1_1101 | YTLYNKIKN | 1378.0 | 0.2588  | Non-antigen |              |           |     |
|            |           | LYNLVKSSA | 3693.8 | -0.1215 | Non-antigen |              |           |     |
|            | DRB1_1201 | TVAILYTLY | 1758.2 | 0.5890  | Antigen     | Allergen     | Non-toxin | No  |
|            | DRB1_1501 | ILYTLYNKI | 1699.3 | 0.1086  | Non-antigen |              |           |     |
|            |           | VAILYTLYN | 1784.4 | 0.5679  | Antigen     | Allergen     | Non-toxin | No  |
|            | DRB1_1602 | LYNLVKSSA | 5550.4 | -0.1215 | Non-antigen |              |           |     |
| AIE40718.1 | DRB1_0101 | FRTLSSSN  | 82.4   | -0.2739 | Non-antigen |              |           |     |
|            |           | FTYLGTIN  | 514.2  | 1.3088  | Antigen     | Non-allergen | Non-toxin | No  |
|            |           | ILFLMSQRY | 1020.4 | 1.0469  | Antigen     | Allergen     | Non-toxin | Yes |
|            |           | LDNLLPSTL | 1122.0 | 0.1797  | Non-antigen |              |           |     |
|            | DRB1_0301 | KLNDTQVY  | 3195.2 | -0.3658 | Non-antigen |              |           |     |
|            |           | FLMSQRYSR | 4187.8 | 0.9843  | Antigen     | Non-allergen | Non-toxin | No  |
|            |           | IHSDQLSKF | 4561.7 | -0.6628 | Non-antigen |              |           |     |
|            |           | FYLDNLLPS | 4731.8 | 0.2071  | Non-antigen |              |           |     |
|            |           | LNDDTQVYY | 6690.6 | -0.1260 | Non-antigen |              |           |     |
|            |           | IQNTGKLVR | 7896.7 | 0.3230  | Non-antigen |              |           |     |
|            |           | NIHSDQLSK | 9409.4 | -0.5227 | Non-antigen |              |           |     |
|            |           | VYYSGEIIR | 9916.7 | -0.1812 | Non-antigen |              |           |     |
|            | DRB1_0401 | FYLDNLLPS | 1845.4 | 0.2071  | Non-antigen |              |           |     |
|            |           | YYSGEIIRA | 2800.3 | -0.0677 | Non-antigen |              |           |     |
|            |           | YLGTINHS  | 3337.8 | 0.9323  | Antigen     | Allergen     | Non-toxin | No  |
|            |           | FRTLSSSN  | 3624.0 | -0.2739 | Non-antigen |              |           |     |
|            |           | IIRAATTSP | 5041.0 | 0.1415  | Non-antigen |              |           |     |
|            |           | FLMSQRYSR | 5207.1 | 0.9843  | Antigen     | Non-allergen | Non-toxin | No  |
|            |           | IRAATTSPV | 5385.3 | 0.4958  | Antigen     | Allergen     | Non-toxin | No  |
|            |           | IFLQVSDHK | 6707.5 | 0.3403  | Non-antigen |              |           |     |
|            |           | FQKIVNQLD | 7177.7 | -0.3769 | Non-antigen |              |           |     |

|  |           |            |        |         |             |              |           |     |
|--|-----------|------------|--------|---------|-------------|--------------|-----------|-----|
|  |           | YSGEINLVH  | 7526.1 | 0.8764  | Antigen     | Allergen     | Non-toxin | No  |
|  | DRB1_0701 | YNESKPPTTI | 136.7  | 0.4770  | Antigen     | Allergen     | Non-toxin | No  |
|  | DRB1_0801 | FLMSQRYSR  | 119.2  | 0.9843  | Antigen     | Non-allergen | Non-toxin | No  |
|  |           | FSYYQKYIE  | 200.0  | 0.6113  | Antigen     | Allergen     | Non-toxin | Yes |
|  |           | LFLMSQRYIS | 225.6  | 0.9976  | Antigen     | Non-allergen | Non-toxin | Yes |
|  |           | YVLSTIHIY  | 702.2  | 0.5976  | Antigen     | Allergen     | Non-toxin | No  |
|  | DRB1_0901 | YVLSTIHIY  | 468.5  | 0.5976  | Antigen     | Allergen     | Non-toxin | No  |
|  |           | YFTYLGTTI  | 944.9  | 1.2121  | Antigen     | Allergen     | Non-toxin | No  |
|  |           | LREACFSYY  | 1007.0 | 1.5067  | Antigen     | Non-allergen | Non-toxin | No  |
|  |           | IRAATTSPV  | 1083.0 | 0.4958  | Antigen     | Allergen     | Non-toxin | No  |
|  | DRB1_1001 | FRTLLSSSN  | 78.7   | -0.2739 | Non-antigen |              |           |     |
|  |           | FTYLGT TIN | 415.5  | 1.3088  | Antigen     | Non-allergen | Non-toxin | No  |
|  |           | YFTYLGT TI | 576.3  | 1.2121  | Antigen     | Allergen     | Non-toxin | No  |
|  |           | YYSGEIIRA  | 697.3  | -0.0677 | Non-antigen |              |           |     |
|  |           | FQKIVNQLD  | 898.8  | -0.3769 | Non-antigen |              |           |     |
|  |           | LSKFRTLLS  | 955.7  | -0.7350 | Non-antigen |              |           |     |
|  |           | YLGTTINHS  | 1264.2 | 0.9323  | Antigen     | Allergen     | Non-toxin | No  |
|  |           | KFRTLLSSS  | 1324.9 | -0.1537 | Non-antigen |              |           |     |
|  |           | YFQKIVNQL  | 1329.9 | -0.5633 | Non-antigen |              |           |     |
|  |           | LKTLDIHYN  | 1502.0 | 1.4807  | Antigen     | Allergen     | Non-toxin | Yes |
|  |           | YISGGFLPN  | 1563.1 | 0.5635  | Antigen     | Non-allergen | Non-toxin | No  |
|  | DRB1_1101 | FLMSQRYSR  | 1171.3 | 0.9843  | Antigen     | Non-allergen | Non-toxin | No  |
|  |           | LVHWNKKKY  | 1756.8 | 1.0410  | Antigen     | Allergen     | Non-toxin | Yes |
|  |           | LFLMSQRYIS | 3080.1 | 0.9976  | Antigen     | Non-allergen | Non-toxin | Yes |
|  |           | VHWNKKKYS  | 4034.1 | 1.1380  | Antigen     | Allergen     | Non-toxin | Yes |
|  |           | FRTLLSSSN  | 4059.2 | -0.2739 | Non-antigen |              |           |     |

|            |           |           |        |         |             |              |           |     |
|------------|-----------|-----------|--------|---------|-------------|--------------|-----------|-----|
|            |           | ILFLMSQRY | 4124.7 | 1.0469  | Antigen     | Allergen     | Non-toxin | Yes |
|            |           | FYLDNLLPS | 4347.3 | 0.2071  | Non-antigen |              |           |     |
|            | DRB1_1201 | ILFLMSQRY | 261.9  | 1.0469  | Antigen     | Allergen     | Non-toxin | Yes |
|            |           | LREACFSYY | 1120.0 | 1.5067  | Antigen     | Non-allergen | Non-toxin | No  |
|            |           | RLKTLDIHY | 2207.3 |         |             |              |           |     |
|            | DRB1_1301 | LVHWNKKKY | 11.8   | 1.0410  | Antigen     | Allergen     | Non-toxin | Yes |
|            |           | ILFLMSQRY | 17.0   | 1.0469  | Antigen     | Allergen     | Non-toxin | Yes |
|            |           | YVLSTIHIY | 30.8   | 0.5976  | Antigen     | Allergen     | Non-toxin | No  |
|            |           | FLMSQRYSR | 31.1   | 0.9843  | Antigen     | Non-allergen | Non-toxin | No  |
|            |           | LMSQRYSRE | 54.6   | 0.6987  | Antigen     | Allergen     | Non-toxin | No  |
|            |           | LFLMSQRY  | 68.2   | 0.9976  | Antigen     | Non-allergen | Non-toxin | Yes |
|            | DRB1_1501 | ILFLMSQRY | 2239.5 | 1.0469  | Antigen     | Allergen     | Non-toxin | Yes |
|            |           | SVFYLDNLL | 3080.8 | 0.0793  | Non-antigen |              |           |     |
|            | DRB1_1602 | FMKWLSDLR | 2006.8 | -0.6057 | Non-antigen |              |           |     |
|            |           | LSKFRTLLS | 2175.9 | -0.7350 | Non-antigen |              |           |     |
|            |           | YFMKWLSDL | 2295.9 | -0.8350 | Non-antigen |              |           |     |
|            |           | YFTYLGTIT | 2555.2 | 1.2121  | Antigen     | Allergen     | Non-toxin | No  |
|            |           | FRTLLSSSN | 2829.0 | -0.2739 | Non-antigen |              |           |     |
|            |           | WIIFPTPIN | 2984.5 | 0.2427  | Non-antigen |              |           |     |
|            |           | KFRTLLSSS | 3144.8 | -0.1537 | Non-antigen |              |           |     |
|            |           | YFQKIVNQL | 3232.6 | -0.5633 | Non-antigen |              |           |     |
|            |           | FLMSQRYSR | 4602.0 | 0.9843  | Antigen     | Non-allergen | Non-toxin | No  |
| AIE40702.1 | DRB1_0101 | IKWLPIGLL | 1272.2 | 2.7532  | Antigen     | Allergen     | Non-toxin | No  |
|            |           | DALLPASLK | 1444.1 | 0.6738  | Antigen     | Allergen     | Non-toxin | No  |
|            |           | PIGLLALAI | 1555.2 | 1.2622  | Antigen     | Non-allergen | Non-toxin | No  |
|            | DRB1_0301 | IGIDTRLPY | 1236.3 | 1.2256  | Antigen     | Allergen     | Non-toxin | Yes |
|            |           | IYPDKSIVR | 1352.2 | -2046   | Non-antigen |              |           |     |
|            | DRB1_0701 | IIDIKWLPI | 182.3  | 3.0239  | Antigen     | Allergen     | Non-toxin | No  |

|            |           |            |        |         |             |              |           |     |
|------------|-----------|------------|--------|---------|-------------|--------------|-----------|-----|
|            | DRB1_0901 | WLPIGLLAL  | 532.5  | 1.9828  | Antigen     | Allergen     | Non-toxin | No  |
|            | DRB1_1001 | PIGLLALAI  | 1657.7 | 1.2622  | Antigen     | Non-allergen | Non-toxin | No  |
|            | DRB1_1201 | PIGLLALAI  | 1327.3 | 1.2622  | Antigen     | Non-allergen | Non-toxin | No  |
|            |           | IKWLPIGLL  | 1858.9 | 2.7532  | Antigen     | Allergen     | Non-toxin | No  |
|            | DRB1_1301 | LLALAILIL  | 34.9   | 0.6819  | Antigen     | Allergen     | Non-toxin | No  |
|            | DRB1_1501 | PIGLLALAI  | 4529.4 | 1.2622  | Antigen     | Non-allergen | Non-toxin | No  |
| AIE40669.1 | DRB1_0101 | FLLLTISIPI | 229.8  | 0.6883  | Antigen     | Allergen     | Non-toxin | Yes |
|            |           | KHLALARYI  | 553.4  | 0.2406  | Non-antigen |              |           |     |
|            |           | FEFLMSLYK  | 950.2  | 0.2590  | Non-antigen |              |           |     |
|            |           | FSRLKENYI  | 973.6  | 0.1656  | Non-antigen |              |           |     |
|            |           | GLLKKFEFL  | 1052.7 | 0.6653  | Antigen     | Non-allergen | Non-toxin | Yes |
|            |           | YLMDKLNLT  | 1086.1 | 0.8795  | Antigen     | Non-allergen | Non-toxin | No  |
|            |           | LFYVPGYSI  | 1510.0 | -0.3604 | Non-antigen |              |           |     |
|            |           | FSRGLSRPL  | 1589.4 | -0.7260 | Non-antigen |              |           |     |
|            | DRB1_0301 | VYTDNTKHL  | 5308.8 | 0.2162  | Non-antigen |              |           |     |
|            |           | RILDQETFF  | 6938.1 | -0.1539 | Non-antigen |              |           |     |
|            |           | TKYDPVLMF  | 8104.0 | 0.9791  | Antigen     | Allergen     | Non-toxin | No  |
|            |           | LTKSDVQLL  | 9990.8 | 0.5134  | Antigen     | Allergen     | Non-toxin | No  |
|            | DRB1_0401 | FLLLTISIPI | 1437.9 | 0.6883  | Antigen     | Allergen     | Non-toxin | Yes |
|            |           | YLMDKLNLT  | 2568.5 | 0.8795  | Antigen     | Non-allergen | Non-toxin | No  |
|            |           | YETLANIST  | 4342.6 | 0.2604  | Non-antigen |              |           |     |
|            |           | YVPGYSITT  | 5683.5 | -0.1792 | Non-antigen |              |           |     |
|            |           | LFWFKNTQF  | 5872.5 | 1.3991  | Antigen     | Allergen     | Non-toxin | No  |
|            |           | WIPETAIWS  | 7029.0 | -0.1739 | Non-antigen |              |           |     |
|            |           | FIANGSFSG  | 7627.5 | 0.4132  | Antigen     | Allergen     | Non-toxin | No  |
|            | DRB1_0701 | YIFTGPVPI  | 17.2   | 0.0600  | Non-antigen |              |           |     |
|            |           | FLLLTISIPI | 36.6   | 0.6883  | Antigen     | Allergen     | Non-toxin | Yes |
|            |           | FDITKHTLF  | 40.4   | 0.2901  | Non-antigen |              |           |     |
|            |           | LFYVPGYSI  | 44.6   | -0.3604 | Non-antigen |              |           |     |

|  |           |            |        |         |             |              |           |     |
|--|-----------|------------|--------|---------|-------------|--------------|-----------|-----|
|  |           | FSRLKENYI  | 51.6   | 0.1656  | Non-antigen |              |           |     |
|  |           | LFWFKNTQF  | 134.0  | 1.3991  | Antigen     | Allergen     | Non-toxin | No  |
|  |           | FSRGLSRPL  | 134.9  | -0.7260 | Non-antigen |              |           |     |
|  |           | KHLALARYI  | 143.9  | 0.2406  | Non-antigen |              |           |     |
|  | DRB1_0801 | FFSRGLSRP  | 353.2  | -0.0321 | Non-antigen |              |           |     |
|  |           | FLMSLYKGP  | 366.1  | -0.0441 | Non-antigen |              |           |     |
|  |           | FLLLTISIPI | 448.7  | 0.6883  | Antigen     | Allergen     | Non-toxin | Yes |
|  |           | LMSLYKGPI  | 514.9  | -0.0191 | Non-antigen |              |           |     |
|  |           | FWFKNTQFD  | 755.2  | 1.7273  | Antigen     | Allergen     | Non-toxin | No  |
|  |           | LALARYIHQ  | 906.3  | 0.0365  | Non-antigen |              |           |     |
|  |           | LLLTISIPIY | 915.1  | 0.3717  | Non-antigen |              |           |     |
|  |           | TFFSRGLSR  | 924.9  | 0.1537  | Non-antigen |              |           |     |
|  | DRB1_0901 | FSRGLSRPL  | 249.8  | -0.7260 | Non-antigen |              |           |     |
|  |           | KHLALARYI  | 397.6  | 0.2406  | Non-antigen |              |           |     |
|  |           | YYPISLGLL  | 519.3  | 20.775  | Antigen     | Non-allergen | Non-toxin | No  |
|  |           | LRKFSAALPT | 531.1  | 0.2577  | Non-antigen |              |           |     |
|  |           | FLLFYVPGY  | 583.9  | -0.3302 | Non-antigen |              |           |     |
|  |           | FTKYDPVLM  | 866.5  | 0.9535  | Antigen     | Allergen     | Non-toxin | No  |
|  |           | YIFTGPVPI  | 961.3  | 0.0600  | Non-antigen |              |           |     |
|  |           | FSRLKENYI  | 963.6  | 0.1656  | Non-antigen |              |           |     |
|  |           | FLLLTISIPI | 1321.8 | 0.6883  | Antigen     | Allergen     | Non-toxin | Yes |
|  | DRB1_1001 | FLLLTISIPI | 375.8  | 0.6883  | Antigen     | Allergen     | Non-toxin | Yes |
|  |           | YETLANIST  | 510.4  | 0.2604  | Non-antigen |              |           |     |
|  |           | YIFTGPVPI  | 595.0  | 0.0600  | Non-antigen |              |           |     |
|  |           | LLTSIPIYN  | 599.3  | 0.1333  | Non-antigen |              |           |     |
|  |           | FEFLMSLYK  | 675.2  | 0.2590  | Non-antigen |              |           |     |
|  |           | LRKFSAALPT | 752.0  | 0.2577  | Non-antigen |              |           |     |
|  |           | YVSYLRKFS  | 1174.1 | -0.0881 | Non-antigen |              |           |     |
|  |           | FTKYDPVLM  | 1230.9 | 0.9535  | Antigen     | Allergen     | Non-toxin | No  |
|  |           | YLRKFSAALP | 1275.0 | 0.2869  | Non-antigen |              |           |     |
|  |           | KFEFLMSLY  | 1587.5 | 0.8440  | Antigen     | Non-antigen  | Non-toxin | No  |
|  |           | FISFLLLT   | 1664.8 | 0.7759  | Antigen     | Non-allergen | Non-toxin | Yes |
|  | DRB1_1101 | YVSYLRKFS  | 344.0  | -0.0881 | Non-antigen |              |           |     |
|  |           | YKNAQRRIL  | 1731.4 | -1.0318 | Non-antigen |              |           |     |
|  |           | YKPLFSRLK  | 2221.4 | -0.5085 | Non-antigen |              |           |     |

|  |           |            |        |         |             |              |           |     |
|--|-----------|------------|--------|---------|-------------|--------------|-----------|-----|
|  |           | VSYLRLKFSA | 2860.1 | -0.0986 | Non-antigen |              |           |     |
|  |           | VYKNAQRRI  | 3147.9 | -1.0519 | Non-antigen |              |           |     |
|  |           | FLLLTISIPI | 3418.9 | 0.6883  | Antigen     | Allergen     | Non-toxin | Yes |
|  |           | GRYVSYLRLK | 4358.2 | 0.5695  | Antigen     | Allergen     | Non-toxin | Yes |
|  | DRB1_1201 | LANISTILY  | 481.5  | 0.2066  | Non-antigen |              |           |     |
|  |           | TKHLALARY  | 485.2  | 0.5127  | Antigen     | Non-allergen | Non-toxin | Yes |
|  |           | KHTLFRYVY  | 854.4  | -0.7528 | Non-antigen |              |           |     |
|  |           | ITKHTLFRY  | 890.4  | -0.9639 | Non-antigen |              |           |     |
|  |           | LGLLKKFEF  | 1442.2 | 1.1879  | Antigen     | Non-allergen | Non-toxin | Yes |
|  |           | FSALPTNEF  | 1604.7 | 0.1538  | Non-antigen |              |           |     |
|  |           | LMSLYKGPI  | 1961.5 | -0.0191 | Non-antigen |              |           |     |
|  |           | FSRLKENYI  | 2007.7 | 0.1656  | Non-antigen |              |           |     |
|  | DRB1_1301 | VYKNAQRRI  | 19.0   | -1.0519 | Non-antigen |              |           |     |
|  |           | ITKHTLFRY  | 37.2   | -0.9639 | Non-antigen |              |           |     |
|  |           | LFSRLKENY  | 50.2   | 0.2524  | Non-antigen |              |           |     |
|  |           | ISLGLLKKF  | 56.4   | 0.8271  | Antigen     | Non-allergen | Non-toxin | No  |
|  | DRB1_1501 | LFYVPGYSI  | 676.5  | -0.3604 | Non-antigen |              |           |     |
|  |           | FLLLTISIPI | 1130.2 | 0.6883  | Antigen     | Allergen     | Non-toxin | Yes |
|  |           | LFWFKNTQF  | 1219.0 | 1.3991  | Antigen     | Allergen     | Non-toxin | No  |
|  |           | YLRKFSALEP | 1993.1 | 0.2869  | Non-antigen |              |           |     |
|  |           | FEFLMSLYK  | 2766.9 | 0.2590  | Non-antigen |              |           |     |
|  |           | LLFYVPGYS  | 2971.0 | -0.4438 | Non-antigen |              |           |     |
|  |           | TNEFISFLL  | 2973.2 | 0.2373  | Non-antigen |              |           |     |
|  |           | FLLFYVPGY  | 3412.7 | -0.3302 | Non-antigen |              |           |     |
|  |           | KHLALARYI  | 3624.5 | 0.2406  | Non-antigen |              |           |     |
|  |           | FSRGLSRPL  | 3737.9 | -0.7260 | Non-antigen |              |           |     |
|  |           | LMSLYKGPI  | 4260.5 | -0.0191 | Non-antigen |              |           |     |
|  |           | HLALARYIH  | 4538.6 | 0.2737  | Non-antigen |              |           |     |
|  |           | LRKFSALEPT | 4915.2 | 0.2577  | Non-antigen |              |           |     |
|  | DRB1_1602 | FLLLTISIPI | 1139.5 | 0.6883  | Antigen     | Allergen     | Non-toxin | Yes |
|  |           | LRKFSALEPT | 2038.0 | 0.2577  | Non-antigen |              |           |     |
|  |           | YETLANIST  | 2818.0 | 0.2604  | Non-antigen |              |           |     |
|  |           | YVPGYSITT  | 4107.0 | -0.1792 | Non-antigen |              |           |     |
|  |           | WFKNTQFDI  | 4559.8 | 1.3512  | Antigen     | Allergen     | Non-toxin | No  |
|  |           | FLLFYVPGY  | 5035.2 | -0.3302 | Non-antigen |              |           |     |
|  |           | YKPLFSRLK  | 5406.6 | -0.5085 | Non-antigen |              |           |     |



**Table S2:** Prediction of cytotoxic T cell epitopes and their antigenicity, allergenicity, toxicity and interferon- $\gamma$  inducing ability

| Protein ID | Allele    | Peptide   | Binding Affinity (nM) | Vaxijen score | Antigen/Non-antigen | Allergenicity | Toxicity  | Interferon- $\gamma$ inducing ability |
|------------|-----------|-----------|-----------------------|---------------|---------------------|---------------|-----------|---------------------------------------|
| AIE40786.1 | HLA-A0101 | YTCRGHNY  | 7.28                  | 0.8296        | Antigen             | Non-allergen  | Non-toxin | No                                    |
|            |           | LSLLLFHSY | 707.69                | 0.4192        | Antigen             | Non-allergen  | Non-toxin | No                                    |
|            | HLA-A0201 | KMMVRIYFV | 2.80                  | 0.4661        | Antigen             | Allergen      | Non-toxin | No                                    |
|            |           | WIIGLDFGV | 11.80                 | 0.7114        | Antigen             | Non-allergen  | Non-toxin | No                                    |
|            |           | GLDFGVYSI | 12.93                 | 1.2732        | Antigen             | Allergen      | Non-toxin | No                                    |
|            |           | LLLFHSYAI | 14.28                 | 0.2825        | Non-antigen         |               |           |                                       |
|            | HLA-A0301 | KMRDTLPK  | 18.99                 | 1.391         | Antigen             | Allergen      | Non-toxin | No                                    |
|            |           | ALGEPFSAK | 27.99                 | -0.0205       | Non-antigen         |               |           |                                       |
|            | HLA-A2402 | LYAKHYNNI | 21.35                 | 0.8813        | Antigen             | Allergen      | Non-toxin | No                                    |
|            |           | KWLNPVCMF | 67.13                 | 0.5717        | Antigen             | Allergen      | Non-toxin | No                                    |
|            |           | RYKDYVVKW | 89.30                 | 0.2387        | Non-antigen         |               |           |                                       |
|            |           | IYFVSLSL  | 126.07                | 1.4551        | Antigen             | Non-allergen  | Non-toxin | Yes                                   |
|            |           | YFVSLSL   | 311.90                | 0.9237        | Antigen             | Allergen      | Non-toxin | No                                    |
|            | HLA-A2601 | EITEFFNKM | 46.30                 | -0.2546       | Non-antigen         |               |           |                                       |
|            |           | WIANYSKF  | 175.42                | -0.0018       | Non-antigen         |               |           |                                       |
|            | HLA-B0702 | LPAKDSKWL | 131.22                | 1.4015        | Antigen             | Non-allergen  | Non-toxin | No                                    |

|            |           |           |        |         |             |              |           |     |
|------------|-----------|-----------|--------|---------|-------------|--------------|-----------|-----|
|            | HLA-B0801 | MVRIYFVSL | 4.14   | 1.0205  | Antigen     | Allergen     | Non-toxin | No  |
|            |           | LLLFHSYAI | 17.43  | 0.2825  | Non-antigen |              |           |     |
|            |           | KMMVRIYFV | 148.98 | 0.4661  | Antigen     | Allergen     | Non-toxin | No  |
|            |           | SNRRYLCTV | 163.03 | 0.4989  | Antigen     | Non-allergen | Non-toxin | No  |
|            | HLA-B2705 | RRYLCTVTT | 39.72  | 0.1697  | Non-antigen |              |           |     |
|            |           | GRYDCYVHY | 46.52  | 0.9012  | Antigen     | Allergen     | Non-toxin | Yes |
|            | HLA-B3901 | WKNPSGWII | 78.77  | -0.5101 | Non-antigen |              |           |     |
|            |           | NPSGWIIGL | 86.86  | -0.2291 | Non-antigen |              |           |     |
|            |           | MKMKMMVRI | 440.52 | 0.8614  | Antigen     | Allergen     | Non-toxin | Yes |
|            | HLA-B4001 | FENVTEEYI | 102.10 | 0.1350  | Non-antigen |              |           |     |
|            | HLA-B5801 | CSAVSTSLF | 35.79  | 0.2594  | Non-antigen |              |           |     |
|            |           | QGVVRSHVW | 44.37  | -0.3723 | Non-antigen |              |           |     |
|            |           | KTLTTTVVL | 68.34  | 0.1327  | Non-antigen |              |           |     |
| AIE40778.1 | HLA-A0101 | VSDYVSELY | 2.70   | -0.0643 | Non-antigen |              |           |     |
|            |           | LSCNGETKY | 416.18 | 0.8019  | Antigen     | Non-allergen | Non-toxin | No  |
|            |           | SCDKNNDQY | 490.96 | 0.1249  | Non-antigen |              |           |     |
|            |           | VTFTCDSGY | 521.20 | 0.3869  | Non-antigen |              |           |     |

|  |           |            |        |         |             |              |           |     |
|--|-----------|------------|--------|---------|-------------|--------------|-----------|-----|
|  |           | EIESLEATY  | 823.22 | 1.1217  | Antigen     | Allergen     | Non-toxin | No  |
|  | HLA-A0201 | FLISIIVLV  | 3.05   | 0.4824  | Antigen     | Allergen     | Non-toxin | No  |
|  |           | TLLCVLPVAV | 3.77   | 0.9222  | Antigen     | Allergen     | Non-toxin | No  |
|  |           | TIMGVIFLI  | 8.53   | 0.2475  | Non-antigen |              |           |     |
|  |           | IMALTIMGV  | 9.49   | 0.8565  | Antigen     | Allergen     | Non-toxin | Yes |
|  |           | KMCTVSDYV  | 14.13  | 0.4266  | Antigen     | Allergen     | Non-toxin | No  |
|  | HLA-A2402 | TIMGVIFLI  | 268.68 | 0.2475  | Non-antigen |              |           |     |
|  | HLA-A2601 | MTINCDVGY  | 66.78  | 0.6250  | Antigen     | Allergen     | Non-toxin | No  |
|  |           | EATYHIIIM  | 562.11 | 0.4046  | Antigen     | Allergen     | Non-toxin | No  |
|  | HLA-B0702 | VPTMNNAKL  | 74.14  | 0.2287  | Non-antigen |              |           |     |
|  | HLA-B3901 | YHSLDPNAV  | 10.67  | 1.0653  | Antigen     | Allergen     | Non-toxin | Yes |
|  |           | YEVNSTMTL  | 32.49  | 0.9371  | Antigen     | Non-allergen | Non-toxin | Yes |
|  |           | MKTISVVTL  | 63.33  | 0.8900  | Antigen     | Allergen     | Non-toxin | No  |
|  |           | TCDSGYHSL  | 136.32 | -0.1492 | Non-antigen |              |           |     |
|  |           | TYHIIIMAL  | 329.34 | 0.4999  | Antigen     | Allergen     | Non-toxin | No  |
|  |           | YSFGEYMTI  | 429.73 | 0.2069  | Non-antigen |              |           |     |
|  | HLA-B4001 | YEVNSTMTL  | 3.77   | 0.9371  | Antigen     | Non-allergen | Non-toxin | Yes |
|  |           | LEATYHIII  | 11.24  | 0.6444  | Antigen     | Allergen     | Non-toxin | Yes |
|  |           | YEVIGVSYI  | 44.25  | 1.1025  | Antigen     | Allergen     | Non-toxin | No  |
|  |           | LEHGSCQPV  | 50.88  | 0.3503  | Non-antigen |              |           |     |

|            |           |           |        |         |             |              |           |     |
|------------|-----------|-----------|--------|---------|-------------|--------------|-----------|-----|
|            | HLA-B5801 | KTISVVTLL | 9.79   | 0.6191  | Antigen     | Allergen     | Non-toxin | No  |
|            |           | VSDYVSELY | 49.86  | -0.0643 | Non-antigen |              |           |     |
|            |           | SSTCIDGKW | 65.76  | 0.9705  | Antigen     | Non-allergen | Non-toxin | No  |
|            |           | NAVCETDKW | 73.34  | -0.0808 | Non-antigen |              |           |     |
|            |           | MALTIMGVI | 122.02 | 0.7773  | Antigen     | Allergen     | Non-toxin | No  |
|            |           | YISCTANSW | 132.37 | 0.7152  | Antigen     | Allergen     | Non-toxin | No  |
| AIE40766.1 | HLA-A0101 | HSEDIELCY | 8.31   | 1.2122  | Antigen     | Allergen     | Non-toxin |     |
|            |           | VSLSGNLKY | 529.48 | 1.0750  | Antigen     | Non-allergen | Non-toxin | No  |
|            |           | FTAICMLIA | 855.02 | 1.2871  | Antigen     | Allergen     | Non-toxin | No  |
|            | HLA-A0201 | MMMKWIISI | 2.49   | -0.0467 | Non-antigen |              |           |     |
|            |           | ILTMSIMPV | 9.05   | 0.9840  | Antigen     | Non-allergen | Non-toxin | Yes |
|            |           | MLIASTLIV | 9.20   | 0.2693  | Non-antigen |              |           |     |
|            | HLA-A0301 | LTYSSSIFR | 30.06  | -0.1911 | Non-antigen |              |           |     |
|            |           | STSTILTSK | 50.90  | 0.4175  | Antigen     | Allergen     | Non-toxin | No  |
|            |           | IVSLSGNLK | 119.48 | 0.6211  | Antigen     | Non-allergen | Non-toxin | No  |
|            |           | IIYVFKKIK | 120.26 | 0.5630  | Antigen     | Allergen     | Non-toxin | Yes |
|            | HLA-A2402 | TYSSSIFRF | 8.91   | -0.4436 | Non-antigen |              |           |     |
|            |           | RYNFINRTF | 21.18  | 0.7428  | Antigen     | Allergen     | Non-toxin | No  |
|            |           | VFFTHGYFL | 293.40 | 0.3009  | Non-antigen |              |           |     |

|            |           |           |        |         |             |              |           |     |
|------------|-----------|-----------|--------|---------|-------------|--------------|-----------|-----|
|            | HLA-A2601 | NVFFTHGYF | 438.71 | 0.4356  | Antigen     | Allergen     | Non-toxin | Yes |
|            | HLA-B0801 | TSKHKTYSL | 28.93  | 1.2415  | Antigen     | Allergen     | Non-toxin | No  |
|            |           | MMMKWIISI | 73.19  | -0.0467 | Non-antigen |              |           |     |
|            |           | MMKWIISIL | 91.57  | -0.3719 | Non-antigen |              |           |     |
|            |           | YSLYRSTCI | 107.78 | 0.5128  | Antigen     | Allergen     | Non-toxin | No  |
|            |           | FLKHKYGCS | 125.03 | 0.6659  | Antigen     | Allergen     | Non-toxin | Yes |
|            |           | LKHKYGCSL | 152.80 | 1.2793  | Antigen     | Non-allergen | Non-toxin | Yes |
|            | HLA-B2705 | YRSTCIAII | 77.11  | 1.6925  | Antigen     | Non-allergen | Non-toxin | No  |
|            |           | YRYNFINRT | 93.75  | 0.9717  | Antigen     | Allergen     | Non-toxin | Yes |
|            | HLA-B3901 | MMMKWIISI | 17.10  | -0.0467 | Non-antigen |              |           |     |
|            |           | YRSTCIAII | 80.22  | 1.6925  | Antigen     | Non-allergen | Non-toxin | No  |
|            |           | LKHKYGCSL | 87.11  | 1.2793  | Antigen     | Non-allergen | Non-toxin | Yes |
|            |           | YGCSLNPSL | 381.73 | 0.2511  | Non-antigen |              |           |     |
|            | HLA-B5801 | MSIMPVLTY | 14.36  | 0.8206  | Antigen     | Allergen     | Non-toxin | No  |
|            |           | CSVNVSLI  | 51.42  | 0.8331  | Antigen     | Allergen     | Non-toxin | No  |
|            |           | LTMSIMPVL | 92.32  | 1.1100  | Antigen     | Non-allergen | Non-toxin | No  |
|            |           | VSLSGNLKY | 95.05  | 1.0750  | Antigen     | Non-allergen | Non-toxin | No  |
| AIE40763.1 | HLA-A0101 | ITSTKTIEY | 26.42  | 1.1302  | Antigen     | Allergen     | Non-toxin | No  |
|            |           | VSEHFGLLF | 203.18 | 0.6064  | Antigen     | Allergen     | Non-toxin | Yes |
|            |           | CGDNTGIKY | 771.93 | -0.3577 | Non-antigen |              |           |     |

|  |           |           |        |         |             |              |           |     |
|--|-----------|-----------|--------|---------|-------------|--------------|-----------|-----|
|  | HLA-A0201 | LLMMTLPSI | 5.30   | 0.4259  | Antigen     | Allergen     | Non-toxin | No  |
|  |           | MLMFIFTGI | 5.41   | 0.8393  | Antigen     | Non-allergen | Non-toxin | No  |
|  |           | QLAGYILTV | 6.01   | -0.0246 | Non-antigen |              |           |     |
|  |           | LLIYLCTFV | 8.82   | -0.7341 | Non-antigen |              |           |     |
|  |           | FLFYPSMFT | 11.61  | 0.2117  | Non-antigen |              |           |     |
|  |           | MTLPSIFLI | 14.85  | 0.3971  | Non-antigen |              |           |     |
|  |           | KLSCAVHLI | 16.08  | 0.4933  | Antigen     | Allergen     | Non-toxin | No  |
|  |           | IMVSEHFGL | 30.63  | 0.8002  | Antigen     | Allergen     | Non-toxin |     |
|  |           | SLSDSDVSL | 33.78  | 1.2532  | Antigen     | Allergen     | Non-toxin | Yes |
|  |           | FTLRHIIGL | 37.67  | 0.7181  | Antigen     | Non-allergen | Non-toxin | No  |
|  |           | LLLSGLGTI | 39.11  | 0.3842  | Non-antigen |              |           |     |
|  | HLA-A0301 | VLGLGLSLK | 45.31  | 1.8428  | Antigen     | Allergen     | Non-toxin | Yes |
|  |           | TSKTTILSK | 124.87 | 0.5891  | Antigen     | Allergen     | Non-toxin | No  |
|  | HLA-A2402 | YYQLAGYIL | 27.45  | 0.1599  | Non-antigen |              |           |     |
|  |           | IYLCTFVVI | 30.91  | -0.3139 | Non-antigen |              |           |     |
|  |           | AYTSISVVF | 34.61  | 1.1050  | Antigen     | Non-allergen | Non-toxin | Yes |
|  |           | DYQTMLMFI | 79.85  | 0.5356  | Antigen     | Non-allergen | Non-toxin | No  |
|  |           | LMMTLPSIF | 121.93 | 0.1923  | Non-antigen |              |           |     |

|  |           |           |        |         |             |              |           |     |
|--|-----------|-----------|--------|---------|-------------|--------------|-----------|-----|
|  |           | IYYQLAGYI | 134.77 | 0.2631  | Non-antigen |              |           |     |
|  |           | AFLFYPSMF | 153.90 | 0.1614  | Non-antigen |              |           |     |
|  |           | YQTMLMFIF | 215.54 | 0.3973  | Non-antigen |              |           |     |
|  |           | LFYPSMFTL | 233.58 | 0.2696  | Non-antigen |              |           |     |
|  |           | IFLIITKVF | 300.78 | 0.2382  | Non-antigen |              |           |     |
|  | HLA-A2601 | MVSEHFGLL | 87.04  | 0.7807  | Antigen     | Allergen     | Non-toxin | No  |
|  |           | FIFTGITLF | 242.37 | 0.8996  | Antigen     | Allergen     | Non-toxin | No  |
|  |           | ELCGAFLFY | 353.83 | -0.647  | Non-antigen |              |           |     |
|  |           | IIYYQLAGY | 481.81 | 0.3581  | Non-antigen |              |           |     |
|  |           | CIIDNPTKY | 658.51 | -0.5458 | Non-antigen |              |           |     |
|  |           | CAVHLIIYY | 969.92 | -0.1357 | Non-antigen |              |           |     |
|  | HLA-B0801 | MLRVRILLI | 14.86  | 0.7831  | Antigen     | Allergen     | Non-toxin | Yes |
|  |           | WLLCKLSCA | 49.90  | 0.3963  | Non-antigen |              |           |     |
|  |           | MLMFIFTGI | 106.23 | 0.8393  | Antigen     | Non-allergen | Non-toxin | No  |
|  |           | LLMMTLPSI | 156.26 | 0.4259  | Antigen     | Allergen     | Non-toxin | No  |
|  |           | LIITKVFSF | 219.74 | 0.3177  | Non-antigen |              |           |     |
|  | HLA-B2705 | LRHIIGLLM | 21.11  | -0.2650 | Non-antigen |              |           |     |

|  |           |           |        |         |             |              |           |     |
|--|-----------|-----------|--------|---------|-------------|--------------|-----------|-----|
|  |           | LRVRILLIY | 50.71  | 0.7118  | Antigen     | Allergen     | Non-toxin | Yes |
|  | HLA-B3901 | TKVFSFWLL | 67.59  | 0.0557  | Non-antigen |              |           |     |
|  |           | YYQLAGYIL | 85.52  | 0.1599  | Non-antigen |              |           |     |
|  |           | EHFGLLFLV | 109.52 | 0.9194  | Antigen     | Non-allergen | Non-toxin | Yes |
|  |           | WKLDNHDIL | 117.77 | 0.4789  | Antigen     | Non-allergen | Non-toxin | No  |
|  |           | SMFTLRHII | 208.57 | 0.5652  | Antigen     | Allergen     | Non-toxin | No  |
|  |           | VHLIIYYQL | 333.84 | 0.4360  | Antigen     | Non-allergen | Non-toxin | Yes |
|  |           | HTSARLHSL | 400.69 | 0.4810  | Antigen     | Allergen     | Non-toxin | No  |
|  |           | MFIFTGITL | 417.15 | 1.1652  | Antigen     | Allergen     | Non-toxin | No  |
|  |           | TVLGLGLSL | 452.64 | 1.3036  | Antigen     | Allergen     | Non-toxin | No  |
|  |           | NKTSKTTIL | 465.70 | 0.2606  | Non-antigen |              |           |     |
|  | HLA-B4001 | SEHFGLLFL | 11.44  | 0.9469  | Antigen     | Non-allergen | Non-toxin | Yes |
|  |           | KECVDGTLL | 22.73  | 0.2449  | Non-antigen |              |           |     |
|  |           | IELCGAFLF | 25.37  | -0.4283 | Non-antigen |              |           |     |
|  | HLA-B5801 | MTLPSIFLI | 6.44   | 0.3971  | Non-antigen |              |           |     |
|  |           | IITKVFSFW | 34.04  | -0.3022 | Non-antigen |              |           |     |
|  |           | LSCAVHLII | 37.23  | 0.0829  | Non-antigen |              |           |     |
|  |           | GTIMVSEHF | 50.72  | 0.2432  | Non-antigen |              |           |     |



|            |           |           |        |         |             |              |           |     |
|------------|-----------|-----------|--------|---------|-------------|--------------|-----------|-----|
|            |           | KLIQRHTNW | 73.44  | 0.9000  | Antigen     | Allergen     | Non-toxic | No  |
| AIE40739.1 | HLA-A0201 | FIWFIFHFV | 4.34   | 0.8683  | Antigen     | Non-allergen | Non-toxin | Yes |
|            |           | FIFHFVYSA | 5.43   | 0.5524  | Antigen     | Allergen     | Non-toxin | Yes |
|            |           | LLLVTCCV  | 32.77  | -0.1927 | Non-antigen |              |           |     |
|            | HLA-A2402 | VFIWFIFHF | 59.51  | 0.4355  | Antigen     | Allergen     | Non-toxin | No  |
|            |           | IFAVQTIVF | 241.14 | 0.4262  | Antigen     | Non-allergen | Non-toxin | No  |
|            | HLA-B3901 | TKIDIIFAV | 56.84  | 1.4032  | Antigen     | Allergen     | Non-toxin | No  |
|            | HLA-B5801 | AVQTIVFIW | 43.37  | 0.0882  | Non-antigen |              |           |     |
|            |           | ISNYEPLLL | 97.77  | 0.9456  | Antigen     | Allergen     | Non-toxin | Yes |
|            |           | QTIVFIWFI | 136.42 | 0.3869  | Non-antigen |              |           |     |
| AIE40738.1 | HLA-A0201 | FILGIIITV | 4.64   | 0.6486  | Antigen     | Allergen     | Non-toxin | No  |
|            |           | SIMAFILGI | 8.60   | 0.2928  | Non-antigen |              |           |     |
|            |           | VLIAGIILL | 11.62  | 0.2172  | Non-antigen |              |           |     |
|            |           | ILSCIFAFI | 17.97  | -0.3964 | Non-antigen |              |           |     |
|            |           | KVLSIMAFI | 29.00  | 0.2618  | Non-antigen |              |           |     |
|            | HLA-A0301 | MLIYSMWGK | 19.52  | 0.1378  | Non-antigen |              |           |     |
|            |           | STSPTRTWK | 96.70  | -0.0041 |             |              |           |     |
|            | HLA-A2601 | DMMLMIGNY | 900.70 | 0.7031  | Antigen     | Non-allergen | Non-toxin | No  |
|            | HLA-B0702 | APHRVSGVI | 9.32   | 0.4917  | Antigen     | Non-allergen | Non-toxin | No  |

|            |           |           |        |         |             |              |           |     |
|------------|-----------|-----------|--------|---------|-------------|--------------|-----------|-----|
|            |           | SPTRTWKVL | 11.17  | -0.3057 | Non-antigen |              |           |     |
|            | HLA-B0801 | MIGNYFSGV | 228.85 | -0.3344 | Non-antigen |              |           |     |
|            | HLA-B3901 | WKVLSIMAF | 407.09 | 0.9293  | Antigen     | Allergen     | Non-toxin | No  |
|            | HLA-B5801 | KSTSPTRTW | 4.38   | -0.0037 | Non-antigen |              |           |     |
|            |           | RTWKVLSIM | 47.50  | 0.6901  | Antigen     |              |           |     |
|            |           | KVLSIMAFI | 132.17 | 0.2618  | Non-antigen | Allergen     | Non-toxin | No  |
|            |           | VGMLIYSMW | 136.54 | 0.5505  | Antigen     | Allergen     | Non-toxin | No  |
| AIE40737.1 | HLA-A0201 | LLIGICVAV | 12.05  | 0.2696  | Non-antigen |              |           |     |
|            | HLA-A0301 | AILYTLYNK | 51.39  | 0.4294  | Antigen     | Allergen     | Non-toxin | Yes |
|            | HLA-A2601 | TVAILYTLY | 220.38 | 0.5890  | Antigen     | Allergen     | Non-toxin | No  |
|            | HLA-B3901 | DHISSLYNL | 177.18 | 0.4058  | Antigen     | Allergen     | Non-toxin | No  |
|            | HLA-B4001 | LEKDHISSL | 205.35 | 0.3818  | Non-antigen |              |           |     |
|            | HLA-B5801 | VAVTVAILY | 30.36  | 0.8124  | Antigen     | Allergen     | Non-toxin | No  |
|            |           | VTVAILYTL | 110.25 | 0.6745  | Antigen     | Allergen     | Non-toxin | No  |
| AIE40718.1 | HLA-A0101 | ITENYRNPY | 12.32  | 0.8011  | Antigen     | Non-allergen | Non-toxin | No  |
|            |           | LNDDTQVYY | 57.91  | -0.1260 | Non-antigen |              |           |     |
|            |           | VSDHKNVYF | 197.66 | 1.0903  | Antigen     | Allergen     | Non-toxin | No  |
|            |           | LSDLREACF | 349.90 | 1.7255  | Antigen     | Non-allergen | Non-toxin | No  |
|            |           | TTSPVRENY | 516.23 | 0.7917  | Antigen     | Non-allergen | Non-toxin | No  |

|  |           |           |        |         |             |              |           |     |
|--|-----------|-----------|--------|---------|-------------|--------------|-----------|-----|
|  |           | GSNHLIDVY | 702.32 | -0.0002 | Non-antigen |              |           |     |
|  | HLA-A0201 | FILTAILFL | 8.31   | 0.5392  | Antigen     | Allergen     | Non-toxin | No  |
|  |           | YLDNLLPST | 10.19  | 0.2106  | Non-antigen |              |           |     |
|  |           | STLDYFTYL | 13.58  | 0.1219  | Non-antigen |              |           |     |
|  | HLA-A2402 | KYIEGNKTF | 110.27 | -0.5044 | Non-antigen |              |           |     |
|  |           | YFMKWLSDL | 116.62 | -0.8350 | Non-antigen |              |           |     |
|  |           | VFILTAILF | 125.39 | 0.3203  | Non-antigen |              |           |     |
|  |           | TFAIIAIVF | 195.98 | 1.1105  | Antigen     | Allergen     | Non-toxin | No  |
|  |           | KYSGEINLV | 244.94 | 0.5484  | Antigen     | Allergen     | Non-toxin | No  |
|  | HLA-A2601 | YVLSTIHIY | 176.47 | 0.5976  | Antigen     | Allergen     | Non-toxin | No  |
|  |           | TTIQNTGKL | 345.22 | 0.6904  | Antigen     | Non-allergen | Non-toxin | No  |
|  |           | QVSDHKNVY | 693.24 | 0.2986  | Non-antigen |              |           |     |
|  |           | DLREACFSY | 948.20 | 2.2258  | Antigen     | Non-allergen | Non-toxin | No  |
|  | HLA-B3901 | YKYSGEINL | 84.64  | 0.4526  | Antigen     | Allergen     | Non-toxin | No  |
|  |           | IRAATTSPV | 91.42  | 0.4958  | Antigen     | Allergen     | Non-toxin | No  |
|  |           | HSADAAWII | 156.49 | 0.8212  | Antigen     | Non-allergen | Non-toxin | No  |
|  |           | FVFILTAIL | 174.39 | 0.4639  | Antigen     | Allergen     | Non-toxin | Yes |
|  |           | KHDDGIIII | 240.33 | 0.4287  | Antigen     | Non-allergen | Non-toxin | Yes |
|  |           | NHEGKPHYI | 502.18 | 0.6450  | Antigen     | Allergen     | Non-toxin | Yes |

|            |           |           |        |         |             |              |           |     |
|------------|-----------|-----------|--------|---------|-------------|--------------|-----------|-----|
|            | HLA-B4001 | RENYFMKWL | 30.82  | 0.0580  | Non-antigen |              |           |     |
|            | HLA-B5801 | MSAPFDSVF | 11.72  | -0.0184 | Non-antigen |              |           |     |
|            |           | RSANMSAPF | 19.40  | 0.9595  | Antigen     | Allergen     | Non-toxin | Yes |
|            |           | HSADAAWII | 82.22  | 0.8212  | Antigen     | Non-allergen | Non-toxin | No  |
|            |           | VLSTIHIYW | 92.80  | 1.2426  | Antigen     | Allergen     | Non-toxin | No  |
| AIE40702.1 | HLA-A0101 | ATENIAVRY | 22.82  | 0.4092  | Antigen     | Non-allergen | Non-toxin | Yes |
|            |           | MTDEQIYAF | 35.33  | 0.1515  | Non-antigen |              |           |     |
|            |           | GIDTRLPPY | 108.19 | 0.8200  | Antigen     | Allergen     | Non-toxin |     |
|            | HLA-A0201 | GLLALAILI | 39.83  | 0.7314  | Antigen     | Allergen     | Non-toxin |     |
|            | HLA-A0301 | ALLPASLKK | 21.42  | 0.7775  | Antigen     | Non-allergen | Non-toxin |     |
|            | HLA-A2402 | RYPIIDIKW | 102.23 | 2.5629  | Antigen     | Non-allergen | Non-toxin | Yes |
|            | HLA-B3901 | EPCKRSDAL | 245.79 | 0.5507  | Antigen     | Non-allergen | Non-toxin | No  |
|            | HLA-B4001 | TENIAVRYL | 100.29 | 0.2487  | Non-antigen |              |           |     |
|            | HLA-B5801 | LAILILAFF | 106.82 | 0.4166  | Antigen     | Allergen     | Non-toxin | No  |
| AIE40669.1 | HLA-A0101 | YTDNTKHLA | 19.63  | 0.4447  | Antigen     | Allergen     | Non-toxin | No  |
|            |           | ETAIWSSRY | 20.68  | 0.4582  | Antigen     | Non-allergen | Non-toxin | Yes |
|            |           | LANISTILY | 219.42 | 0.2066  | Non-antigen |              |           |     |
|            |           | YANLDASDY | 771.39 | 0.9525  | Antigen     | Non-allergen | Non-toxin | No  |
|            | HLA-A0201 | VLMFLLFYV | 2.39   | 0.2059  | Non-antigen |              |           |     |

|  |           |           |        |         |             |              |           |     |
|--|-----------|-----------|--------|---------|-------------|--------------|-----------|-----|
|  |           | SLYKGPIPV | 4.67   | -0.0538 | Non-antigen |              |           |     |
|  |           | YLMDKLNLT | 4.73   | 0.8795  | Antigen     | Non-allergen | Non-toxin | No  |
|  |           | YIFTGVPVI | 6.44   | 0.0600  | Non-antigen |              |           |     |
|  |           | FLLLTSIPI | 8.95   | 0.6883  | Antigen     | Allergen     | Non-toxin | Yes |
|  |           | YLFDNAYAG | 30.91  | 0.0523  | Non-antigen |              |           |     |
|  | HLA-A0301 | RGLSRPLMK | 120.30 | -0.0789 | Non-antigen |              |           |     |
|  | HLA-A2402 | RYVSYLRKF | 25.60  | -0.1696 | Non-antigen |              |           |     |
|  |           | IWSSRYANL | 74.79  | 0.9676  | Antigen     | Allergen     | Non-toxin | No  |
|  |           | PLMKNTYLF | 78.61  | 0.2512  | Non-antigen |              |           |     |
|  |           | YYPISLGLL | 86.33  | 2.0775  | Antigen     | Non-allergen | Non-toxin | No  |
|  |           | SYLRKFSAI | 109.36 | -0.2127 | Non-antigen |              |           |     |
|  | HLA-A2601 | ETAIWSSRY | 4.90   | 0.4582  | Antigen     | Non-allergen | Non-toxin | Yes |
|  |           | STILYFTKY | 90.62  | 0.4048  | Antigen     | Non-allergen | Non-toxin | No  |
|  | HLA-B0702 | RPLMKNTYL | 13.91  | 0.1050  | Non-antigen |              |           |     |
|  | HLA-B0801 | SYLRKFSAI | 34.12  | -0.2127 | Non-antigen |              |           |     |
|  |           | RPLMKNTYL | 62.23  | 0.1050  | Non-antigen |              |           |     |
|  |           | GLLKKFEFL | 176.20 | 0.6653  | Antigen     | Non-allergen | Non-toxin | Yes |
|  | HLA-B2705 | GRYVSYLRK | 39.73  | 0.5695  | Antigen     | Allergen     | Non-toxin | Yes |

|  |           |           |        |         |             |              |           |     |
|--|-----------|-----------|--------|---------|-------------|--------------|-----------|-----|
|  |           | RRILDQETF | 79.94  | -0.9809 | Non-antigen |              |           |     |
|  | HLA-B3901 | HQTGDYKPL | 69.56  | 0.6749  | Antigen     | Allergen     | Non-toxin | No  |
|  |           | YIFTGPVPI | 129.67 | 0.0600  | Non-antigen |              |           |     |
|  |           | YKNAQRRIL | 147.81 | -1.0318 | Non-antigen |              |           |     |
|  |           | FLLLTSIPI | 155.22 | 0.6883  | Antigen     | Allergen     | Non-toxin | Yes |
|  |           | KKFEFLMSL | 304.14 | 1.0621  | Antigen     | Allergen     | Non-toxin | No  |
|  |           | TSIPIYNIL | 389.05 | 0.2089  | Non-antigen |              |           |     |
|  | HLA-B4001 | NEFISFLLL | 17.45  | 0.4482  | Antigen     | Allergen     | Non-toxin | Yes |
|  |           | QETFFSRGL | 29.68  | 0.3990  | Non-antigen |              |           |     |
|  |           | TEFIANGSF | 29.87  | 0.4011  | Antigen     | Non-allergen | Non-toxin | Yes |
|  |           | YEEKVNTEF | 30.31  | 0.6875  | Antigen     | Non-allergen | Non-toxin | No  |
|  | HLA-B5801 | LANISTILY | 87.02  | 0.2066  | Non-antigen |              |           |     |

**Table S3:** Prediction of B cell epitopes and their antigenicity, allergenicity, toxicity and interferon- $\gamma$  inducing ability

| Protein ID  | Peptide                              | Vaxijen | Antigen/Non-antigen | Allergen     | Toxin     | Interferon |
|-------------|--------------------------------------|---------|---------------------|--------------|-----------|------------|
| >AIE40786.1 | TLPAKDSKW                            | 1.7428  | Antigen             | Allergen     | Non-toxin | No         |
|             | PFSAKCPPIE                           | 1.3134  | Antigen             | Non-allergen | Non-toxin | Yes        |
|             | VTIGEPANI                            | 0.9400  | Antigen             | Allergen     | Non-toxin | No         |
| AIE40778.1  | NAKLTSTETSFNDK                       | 1.4377  | Antigen             | Non-allergen | Non-toxin | No         |
|             | GYHSLDPNAVCE<br>TDKWKYENP            | 0.5582  | Antigen             | Allergen     | Non-toxin | Yes        |
|             | EKNGNTSWNDTV<br>TCPNAEC              | 0.8791  | Antigen             | Non-allergen | Non-toxin | No         |
|             | GSCQPVKEKYS                          | 0.3830  | Non-antigen         |              |           |            |
|             | TLTGSPSSTCIDG                        | 0.3234  | Non-antigen         |              |           |            |
|             | RSNEEFDPVDDGP<br>DDETDLSK            | 0.7255  | Antigen             | Allergen     | Non-toxin | No         |
| AIE40766.1  | None                                 |         |                     |              |           |            |
| AIE40763.1  | TYTCGDNTGI                           | -0.4193 | Non-antigen         |              |           |            |
| AIE40739.1  | None                                 |         |                     |              |           |            |
| AIE40738.1  | None                                 |         |                     |              |           |            |
| AIE40737.1  | IKNPQNPNPSPNL<br>NSPPPETRNTK         | 0.7588  | Antigen             | Non-allergen | Non-toxin | Yes        |
| AIE40718.1  | NESKPTTIQN                           | 0.3613  | Non-antigen         |              |           |            |
|             | KKYSSYEEAKKH<br>D                    | 0.4567  | Antigen             | Allergen     | Non-toxin | No         |
|             | SNHEGKPHYITEN<br>YRNPYKLNDDETQ<br>VY | 0.2647  | Non-antigen         |              |           |            |
| AIE40702.1  | None                                 |         |                     |              |           |            |

|            |                       |        |                 |  |  |  |
|------------|-----------------------|--------|-----------------|--|--|--|
| AIE40669.1 | IDHPNLSRARS<br>PSDYET | 0.1146 | Non-<br>antigen |  |  |  |
|------------|-----------------------|--------|-----------------|--|--|--|

**Table S4: Physiochemical Properties of the MPXV-MEV construct**

|                                         |                                                                                      |
|-----------------------------------------|--------------------------------------------------------------------------------------|
| Number of amino acids                   | 390                                                                                  |
| Molecular weight                        | 40293.29                                                                             |
| Antigenicity                            | Antigenic (Vaxijen score: 0.5492)                                                    |
| Allergic potential                      | Non-allergen                                                                         |
| Theoretical pI                          | 9.75                                                                                 |
| Instability index                       | Stable (36.04)                                                                       |
| Total number of atoms                   | 5682                                                                                 |
| Aliphatic index                         | 92.72                                                                                |
| Extinction coefficient                  | 36565                                                                                |
| Grand average of hydropathicity (GRAVY) | -0.009                                                                               |
| Estimated half-life                     | >20 hours in yeast, >10 hours in E. coli, and<br>30 hours in mammalian reticulocytes |
